# Supplementary material
Source: HighWire-hosted journal article supplement (https://jnm.snmjournals.org/highwire/filestream/95099/field_highwire_adjunct_files/0/179739_Supplemental_Data.pdf)
Supplement: 179739_Supplemental_Data.pdf [file 179739_Supplemental_Data.pdf]

**Supplemental Table 1.** PET/CT acquisition parameters for the two scanners utilized in this study.

| Parameter                     | Siemens Biograph mCT scanner | Discovery RX PET/CT scanner |
|-------------------------------|------------------------------|-----------------------------|
| CT kVp                        | 120                          | 120                         |
| CT mA                         | Ref 80 mAs                   | 20-200 mA                   |
| CT tube rotation time (sec)   | 0.5                          | 0.5                         |
| CT slice separation (mm)      | 3.3                          | 3.3                         |
| CT slice thickness (mm)       | 4.0                          | 3.75                        |
| CT pixel size (mm)            | 0.98                         | 0.98                        |
| CT pitch                      | 0.8                          | 0.985                       |
| PET time per bed              | 3 min                        | 4 min 15 sec                |
| PET slice separation (mm)     | 3.3                          | 3.3                         |
| PET slice thickness (mm)      | 3.3                          | 3.3                         |
| PET pixel size (mm)           | 4.1                          | 4.7                         |
| PET reconstruction algorithm  | OSEM + TOF                   | OSEM                        |
| PET reconstruction parameters | 2i, 21s, 5 mm Gaussian       | 2i, 21s, 3 mm Gaussian      |
